# Supplementary material
Source: HighWire-hosted journal article supplement (http://heart.bmjjournals.com/highwire/filestream/125357/field_highwire_adjunct_files/0/Supplement_doc.pdf)
Supplement: Supplement_doc.pdf [file Supplement_doc.pdf]

*Supplement 1. Univariate and multiple linear regression analysis of carotid IMT, right arm arterial IMTs, and left ventricular mass*

| Common carotid        | Unadjusted IMT |         | Adjusted IMT |         |
|-----------------------|----------------|---------|--------------|---------|
|                       | Beta           | p-value | Beta         | p-value |
| CoA All               | 67.0           | <0.001  | 49.7         | 0.002   |
| CoA Surgery           | 40.0           | 0.053   | 15.6         | 0.292   |
| CoA Stent             | 80.1           | <0.001  | 67.5         | <0.001  |
| Right arm systolic BP | 2.2            | <0.001  | 1.6          | 0.007   |
| BMI z-score           | 27.6           | 0.002   | 15.0         | 0.044   |
| Age                   | 6.7            | 0.110   | -0.1         | 0.972   |
| Gender (Male)         | 37.5           | 0.030   | 5.2          | 0.720   |
| Right brachial        | Unadjusted IMT |         | Adjusted IMT |         |
|                       | Beta           | p-value | Beta         | p-value |
| CoA All               | 19.0           | 0.038   | -2.7         | 0.749   |
| CoA Surgery           | 3.4            | 0.729   | 4.1          | 0.639   |
| CoA Stented           | 16.4           | 0.106   | -9.0         | 0.312   |
| Right arm systolic BP | 1.39           | <0.001  | 1.0          | 0.003   |
| BMI z-score           | 13.0           | 0.007   | 7.7          | 0.071   |
| Age                   | 7.3            | 0.001   | 4.4          | 0.035   |
| Gender (Male)         | 29.1           | 0.002   | 14.8         | 0.088   |

| Right radial          | Unadjusted IMT |         | Adjusted IMT |         |
|-----------------------|----------------|---------|--------------|---------|
|                       | Beta           | p-value | Beta         | p-value |
| CoA All               | 19.8           | 0.003   | 5.8          | 0.278   |
| CoA Surgery           | 16.4           | 0.031   | 9.5          | 0.102   |
| CoA Stent             | 15.8           | 0.032   | 3.6          | 0.516   |
| Right arm systolic BP | 1.1            | 0.001   | 0.6          | 0.004   |
| BMI z-score           | 2.9            | 0.482   | -4.0         | 0.190   |
| Age                   | 6.2            | <0.001  | 3.5          | 0.008   |
| Gender (Male)         | 33.2           | <0.001  | 24.7         | <0.001  |
| Right ulnar           | Unadjusted IMT |         | Adjusted IMT |         |
|                       | Beta           | p-value | Beta         | p-value |
| CoA All               | 6.6            | 0.375   | -3.3         | 0.656   |
| CoA Surgery           | 2.1            | 0.792   | -1.3         | 0.866   |
| CoA Stent             | 14.5           | 0.079   | 4.8          | 0.533   |
| Right arm systolic BP | 0.5            | 0.078   | 0.1          | 0.660   |
| BMI z-score           | 2.9            | 0.484   | -0.04        | 0.992   |
| Age                   | 4.5            | 0.015   | 2.7          | 0.132   |
| Gender (Male)         | 33.9           | <0.001  | 31.0         | <0.001  |

| Left ventricle | Unadjusted mass |         | Adjusted mass |         |
|----------------|-----------------|---------|---------------|---------|
|                | Beta            | p-value | Beta          | p-value |
| CoA All        | 25.3            | 0.025   | 2.8           | 0.774   |
| CoA Surgery    | -1.6            | 0.900   | -13.6         | 0.180   |
| CoA Stent      | 47.7            | <0.001  | 25.9          | 0.013   |

| Left ventricle        | Unadjusted mass |        | Adjusted mass |       |
|-----------------------|-----------------|--------|---------------|-------|
| Right arm systolic BP | 1.5             | <0.001 | 0.7           | 0.068 |
| BMI z-score           | 21.1            | <0.001 | 14.6          | 0.003 |
| Age                   | 11.4            | <0.001 | 8.1           | 0.001 |
| Gender (Male)         | 43.7            | <0.001 | 27.2          | 0.006 |

IMT, intima-media thickness; CoA, coarctation of the aorta; BP, blood pressure; BMI, body mass index; Beta, regression coefficient. The unit is micrometer for IMT, mmHg for BP, gram for LV-mass and years for age. CoA All, CoA surgery, and CoA stent adjusted for right arm systolic BP, BMI z-score, age and gender. Right arm systolic BP, BMI z-score, age and gender adjusted for CoA, right arm systolic BP, BMI z-score, age and gender as appropriate.

*Supplement 2. Univariate and multiple regression analyses of left arm arterial IMT*

| Left brachial        | Unadjusted IMT |         | Adjusted IMT |         |
|----------------------|----------------|---------|--------------|---------|
|                      | Beta           | p-value | Beta         | p-value |
| CoA All              | -19.4          | 0.009   | -22.3        | 0.001   |
| CoA Subclavian flap  | -37.0          | <0.001  | -33.0        | <0.001  |
| CoA Stent            | 0.7            | 0.993   | -12.0        | 0.081   |
| Left arm systolic BP | 1.5            | <0.001  | 0.9          | 0.001   |
| BMI z-score          | 12.6           | 0.001   | 6.7          | 0.046   |
| Age                  | 5.1            | 0.007   | 4.1          | 0.006   |
| Gender (Male)        | 19.4           | 0.015   | 17.5         | 0.005   |
| Left radial          | Unadjusted IMT |         | Adjusted IMT |         |
|                      | Beta           | p-value | Beta         | p-value |
| CoA All              | -10.2          | 0.111   | -11.6        | 0.047   |
| CoA Subclavian flap  | -20.7          | 0.005   | -19.2        | 0.023   |
| CoA Stent            | 5.5            | 0.445   | -2.8         | 0.657   |
| Left arm systolic BP | 0.9            | <0.001  | 0.7          | 0.004   |
| BMI z-score          | 3.7            | 0.296   | -1.7         | 0.599   |
| Age                  | 4.4            | 0.007   | 3.1          | 0.028   |
| Gender (Male)        | 22.7           | 0.001   | 21.1         | 0.001   |
| Left ulnar           | Unadjusted IMT |         | Adjusted IMT |         |
|                      | Beta           | p-value | Beta         | p-value |
| CoA All              | -12.5          | 0.153   | -15.5        | 0.096   |
| CoA Subclavian flap  | -18.8          | 0.064   | -30.6        | 0.021   |
| CoA Stent            | 6.0            | 0.542   | 3.5          | 0.727   |
| Left arm systolic BP | 0.4            | 0.286   | 0.4          | 0.381   |
| BMI z-score          | -4.3           | 0.366   | -7.3         | 0.150   |
| Age                  | 2.1            | 0.354   | 1.4          | 0.533   |
| Gender (Male)        | 21.8           | 0.019   | 25.3         | 0.008   |

IMT, intima-media thickness; CoA, coarctation of the aorta; BP, blood pressure; BMI, body mass index; Beta, regression coefficient. The unit is micrometer for IMT, mmHg for BP and years for age. CoA All, CoA subclavian flap and CoA stent adjusted for left arm systolic BP, BMI z-score, age and gender. Left arm systolic BP, BMI z-score, age and gender adjusted for CoA, left arm systolic BP, BMI z-score, age and gender as appropriate.
